# Supplementary material for: Cyto- and bio-compatibility assessment of plasma-treated polyvinylidene fluoride scaffolds for cardiac tissue engineering
Source: Frontiers journal article supplement (doi:10.3389/fbioe.2022.1008436), 2022-11-04
Supplement: Data_Sheet_1.docx [file Data_Sheet_1.docx]

Supplementary Material

Cyto- and bio-compatibility assessment of plasma-treated polyvinylidene fluoride (PVDF) scaffolds for cardiac tissue engineering

**Maria Kitsara1*, Gaëlle Revet1, Jean-Sébastien Vartanian-Grimaldi1, Alexandre Simon1, Mathilde Minguy1, Antoine Miche3, Vincent Humblot3,4, Thierry Dufour2*, Onnik Agbulut1***

1Biological Adaptation and Ageing, UMR CNRS 8256, INSERM ERL 1164, Institut de Biologie Paris-Seine, Sorbonne Université, Paris, 75005, France

2Laboratoire de Physique des Plasmas, UMR CNRS 7648, Sorbonne Université, Paris, 75005, France

3Laboratoire de Réactivité de Surface, UMR CNRS 7197, Sorbonne Université, Paris, 75005, France

3FEMTO-ST Institute, UMR 6174 CNRS, Université Bourgogne Franche-Comté, 15B avenue Montboucons, 23030 Besançon Cedex, France

*** Correspondence:**Dr Maria Kitsara : [kitsara.m@gmail.com](mailto:kitsara.m@gmail.com)

Dr Thierry Dufour : [thierry.dufour@sorbonne-universite.fr](mailto:thierry.dufour@sorbonne-universite.fr)

Prof Onnik Agbulut : [onnik.agbulut@sorbonne-universite.fr](mailto:onnik.agbulut@sorbonne-universite.fr)

**Table S1. Primers sequences used in this study.**

| **Gene** | **Forward (5'-3')** | **Reverse (5'-3')** |
| --- | --- | --- |
| *Actn2* | AGACATGGGCTTACGGCAAA | GCTGCAATCTGTTCCACACG |
| *Myh7* | CAACCTGTCCAAGTTCCGC | TACTCTTCATTCAGGCCCTTGG |
| *Pln* | GCTCCCAGACTTCACACAAC | TCTCCTTTTAGGAGGCCTTGG |
| *Atp2a2* | TCTGCTTGTCCATGTCCCTT | ATTGCAGGCTCCAGGTAGTT |
| *Cryab* | GGAGAGCACCTGTTGGAGTC | CATACGCATCTCTGAGAGCCC |
| *Cdh2* | CACCCGGCTTAAGGGTGATT | CGATCCTGTCTACGTCGGTG |
| *Cdh13* | TGGTCAAGCCCCTGGACTAT | ACCATCATGGGGTCTGGGTA |
| *Col1a1* | TGTGCCTCAGAAGAACTGGT | CGCTTCCATACTCGAACTGG |
| *ECM1* | ATAAAGACCCACCCCCACTC | TCCACAGAGATGGTCCATGA |
| *ELN* | GCTAAATACGGAGCAGCAGG | TACTCCACCAGGAACACCAC |
| *Lama4* | TCACCACACCGATGGCTAAC | TGAGGTTTCTCACTGCGTCC |
| *Lamb2* | GTCTTCGCTGTGACCACTGT | AACCAGCAATGCACCTCTCA |
| *Lamc1* | TTCTACAACCTGCAGAGCGG | TGGTGACAGTCGCAAGGTTT |
| *Actb* | AGATCAAGATCATTGCTCCTCCT | AAGGGTGTAAAACGCAGCTC |
| *B2m* | TGAATTCACACCCACCGAGA | TACATGTCTCGGTCCCAGGT |
| *Nubp1* | CCCAAGTGCAAGAGAGAGTC | ACTTTGCCCAGAAGAGGGAT |

**Table S2. Fold changes of mRNA expression of the genes used to construct the cardiac and the adhesion index.** Non-treated surface values are set at 1.0.Values are given as the means ± standard error of the mean (SEM).

| **Gene** | **Index** | **Ar** | **Ar-N2** | **He** | **He-N2** |
| --- | --- | --- | --- | --- | --- |
| *Actn2* | Cardiac index | 1.30 ± 0.53 | 3.63 ± 1.90 | 1.65 ± 1.31 | 0.98 ± 0.50 |
| *Atp2a2* | 1.10 ± 0.40 | 5.08 ± 2.59 | 1.43 ± 1.10 | 1.09 ± 0.53 |
| *Cryab* | 0.73 ± 0.27 | 1.61 ± 0.85 | 1.14 ± 0.44 | 1.46 ± 0.52 |
| *Myh7* | 1.78 ± 0.55 | 4.38 ± 2.33 | 2.66 ± 1.28 | 1.79 ± 0.65 |
| *Pln* | 1.64 ± 0.49 | 2.32 ± 1.49 | 1.18 ± 0.95 | 1.39 ± 0.87 |
| *Cdh13* | Adhesion index | 0.85 ± 0.47 | 1.78 ± 0.36 | 0.75 ± 0.40 | 1.00 ± 0.35 |
| *Cdh2* | 2.65 ± 0.82 | 2.78 ± 0.81 | 1.98 ± 0.84 | 2.78 ± 0.61 |
| *Col1a1* | 1.78 ± 0.71 | 1.79 ± 1.10 | 1.35 ± 0.64 | 1.72 ± 0.53 |
| *Ecm1* | 1.63 ± 0.44 | 1.61 ± 0.76 | 1.65 ± 0.94 | 1.43 ± 0.34 |
| *Eln* | 1.56 ± 0.47 | 1.32 ± 1.06 | 0.75 ± 0.37 | 1.23 ± 0.63 |
| *Lama4* | 1.94 ± 0.66 | 1.70 ± 0.19 | 2.27 ± 0.95 | 1.53 ± 0.11 |
| *Lamb2* | 1.27 ± 0.34 | 2.05 ± 1.27 | 1.19 ± 0.73 | 1.71 ± 1.00 |
| *Lamc1* | 1.39 ± 0.15 | 1.68 ± 0.57 | 1.52 ± 0.42 | 1.98 ± 0.26 |

**Table S3. Fold changes of mRNA expression of the genes used to construct the cardiac and the adhesion index before normalization.** Values are given as the means ± standard error of the mean (SEM).

| **Gene** | **Index** | **Non-treated** | **Ar** | **Ar-N2** | **He** | **He-N2** |
| --- | --- | --- | --- | --- | --- | --- |
| *Actn2* | Cardiac index | 4.33 ± 0.53 | 5.63 ± 2.28 | 15.72 ± 8.24 | 7.16 ± 5.68 | 4.23 + 2.16 |
| *Atp2a2* | 10.03 ± 1.54 | 11.05 ± 3.97 | 50.99 ± 26.01 | 14.37 ± 11.09 | 10.99 ± 5.36 |
| *Cryab* | 5.98 ± 0.85 | 4.37 ± 1.64 | 9.61 ± 5.09 | 6.79 ± 2.64 | 8.76 ± 3.10 |
| *Myh7* | 1.22 ± 0.15 | 2.18 ± 0.67 | 5.35 ± 2.84 | 3.24 ± 1.56 | 2.19 ± 0.80 |
| *Pln* | 1.18 ± 1.03 | 1.93 ± 0.58 | 2.73 ± 1.76 | 1.39 ± 1.12 | 1.64 ±1.03 |
| *Cdh13* | Adhesion index | 0.57 ± 0.01 | 0.48 ± 0.27 | 1.01 ± 0.20 | 0.43 ± 0.23 | 0.57 ± 0.20 |
| *Cdh2* | 0.33 ± 0.10 | 0.87 ± 0.27 | 0.92 ± 0.27 | 0.65 ± 0.28 | 0.92 ± 0.20 |
| *Col1a1* | 13.71 ± 1.48 | 24.44 ± 9.72 | 24.51 ± 15.01 | 18.47 ± 8,74 | 23.54 ± 7.28 |
| *Ecm1* | 0.03 ± 0.01 | 0.05 ± 0.01 | 0.05 ± 0.03 | 0.06 ± 0.03 | 0.05 ± 0.01 |
| *Eln* | 1.24 ± 0.25 | 1.92 ± 0.58 | 1.63 ± 1.31 | 0.93 ± 0.46 | 1.51 ± 0.78 |
| *Lama4* | 0.08 ± 0.02 | 0.16 ± 0.06 | 0.14 ± 0.02 | 0.19 ± 0.08 | 0.13 ± 0.01 |
| *Lamb2* | 0.28 ± 0.07 | 0.36 ± 0.10 | 0.58 ± 0.36 | 0.34 ± 0.21 | 0.48 ± 0.28 |
| *Lamc1* | 0.67 ± 0.11 | 0.93 ± 0.10 | 1.13 ± 0.39 | 1.02 ± 0.28 | 1.33 ± 0.17 |

**Supplementary Figure S1.** **Scanning electron microscope (SEM) images of drop-cast scaffolds:** (a) Native PVDF scaffold obtained by 5% w/v solution, (b) PVDF scaffold after Ar plasma exposure, (c) PVDF scaffold after He plasma exposure, (d) PVDF scaffold after Ar-N2 plasma exposure, (e) PVDF scaffold after He-N2 plasma exposure. The images (b), (c), (d) and (e) correspond to the side exposed to plasma.
